# Supplementary material for: Effects of Color and Light Intensity on the Foraging and Oviposition Behavior of Culex pipiens biotype molestus Mosquitoes
Source: MDPI journal article supplement (doi:10.3390/insects13110993), 2022-10-29
Supplement: s1 [file s1]

**Table S2:** Results of each replicate of the paperboard-wrapped oviposition site bioassay and ink-colored oviposition site bioassay. Both tested at three light intensities six times. The 1600-lx-light intensity was the maximal light intensity of a 16:8 hours light cycle (Light:Dark; separated by one-hour crepuscular periods; daylight 1600 lx) while the 130 lx and the 0 lx bioassay were at constant light intensity. Given are the number of egg rafts laid in each colored oviposition site (red, blue, yellow, and green), as well as the total of female and male mosquitoes for each replicate.

| Oviposition site   | Lux (lx) | Egg rafts laid in red | Egg rafts laid in blue | Egg rafts laid in yellow | Egg rafts laid in green | Total of female mosquitoes | Total of male mosquitoes | Total of mosquitoes |
|--------------------|----------|-----------------------|------------------------|--------------------------|-------------------------|----------------------------|--------------------------|---------------------|
| paperboard-wrapped | 1600     | 0                     | 9                      | 12                       | 12                      | 90                         | 160                      | 250                 |
|                    | 1600     | 6                     | 1                      | 2                        | 1                       | 83                         | 105                      | 188                 |
|                    | 1600     | 10                    | 9                      | 7                        | 11                      | 76                         | 102                      | 178                 |
|                    | 1600     | 8                     | 1                      | 2                        | 1                       | 196                        | 244                      | 440                 |
|                    | 1600     | 9                     | 7                      | 11                       | 10                      | 100                        | 114                      | 214                 |
|                    | 1600     | 23                    | 4                      | 8                        | 17                      | 109                        | 179                      | 288                 |
| paperboard-wrapped | 130      | 47                    | 9                      | 8                        | 17                      | 117                        | 87                       | 204                 |
|                    | 130      | 10                    | 5                      | 7                        | 7                       | 82                         | 137                      | 219                 |
|                    | 130      | 17                    | 3                      | 3                        | 18                      | 136                        | 188                      | 324                 |
|                    | 130      | 50                    | 14                     | 14                       | 11                      | 202                        | 157                      | 359                 |
|                    | 130      | 2                     | 5                      | 3                        | 1                       | 70                         | 106                      | 176                 |
|                    | 130      | 2                     | 0                      | 1                        | 4                       | 62                         | 76                       | 138                 |
| paperboard-wrapped | 0        | 11                    | 6                      | 7                        | 1                       | 103                        | 83                       | 186                 |
|                    | 0        | 12                    | 15                     | 17                       | 17                      | 106                        | 219                      | 325                 |
|                    | 0        | 27                    | 5                      | 10                       | 7                       | 152                        | 162                      | 314                 |
|                    | 0        | 10                    | 4                      | 4                        | 16                      | 138                        | 189                      | 327                 |
|                    | 0        | 3                     | 4                      | 8                        | 4                       | 141                        | 160                      | 301                 |
|                    | 0        | 4                     | 1                      | 3                        | 5                       | 104                        | 114                      | 218                 |
| ink-colored        | 1600     | 13                    | 27                     | 6                        | 29                      | 182                        | 219                      | 401                 |
|                    | 1600     | 25                    | 24                     | 6                        | 30                      | 300                        | 179                      | 479                 |
|                    | 1600     | 24                    | 13                     | 1                        | 10                      | 112                        | 171                      | 283                 |
|                    | 1600     | 51                    | 64                     | 11                       | 35                      | 305                        | 256                      | 561                 |
|                    | 1600     | 7                     | 10                     | 2                        | 13                      | 42                         | 257                      | 299                 |
|                    | 1600     | 78                    | 62                     | 25                       | 76                      | 433                        | 342                      | 775                 |
| ink-colored        | 130      | 66                    | 51                     | 30                       | 35                      | 184                        | 236                      | 420                 |
|                    | 130      | 9                     | 21                     | 3                        | 22                      | 105                        | 126                      | 231                 |
|                    | 130      | 37                    | 29                     | 15                       | 29                      | 113                        | 207                      | 320                 |
|                    | 130      | 56                    | 16                     | 6                        | 15                      | 117                        | 321                      | 438                 |
|                    | 130      | 65                    | 13                     | 4                        | 20                      | 207                        | 68                       | 275                 |
|                    | 130      | 12                    | 6                      | 19                       | 15                      | 83                         | 258                      | 341                 |
| ink-colored        | 0        | 8                     | 21                     | 4                        | 10                      | 150                        | 171                      | 321                 |
|                    | 0        | 3                     | 16                     | 8                        | 14                      | 74                         | 146                      | 220                 |
|                    | 0        | 0                     | 3                      | 0                        | 2                       | 62                         | 69                       | 131                 |
|                    | 0        | 2                     | 21                     | 21                       | 7                       | 188                        | 178                      | 366                 |
|                    | 0        | 0                     | 2                      | 5                        | 1                       | 48                         | 85                       | 133                 |
|                    | 0        | 0                     | 11                     | 1                        | 6                       | 107                        | 158                      | 265                 |
