# Supplementary material for: Effects of Color and Light Intensity on the Foraging and Oviposition Behavior of Culex pipiens biotype molestus Mosquitoes
Source: MDPI journal article supplement (doi:10.3390/insects13110993), 2022-10-29
Supplement: s1 [file s1]

**Table S5:** Results of two-sided Wald tests for comparing choices of female and male mosquitoes in the two-choice feeding bioassays: red vs. blue, red vs. green and red vs. black. All assays were tested at three light intensities. The 1600 lx light intensity was the maximal light intensity of an 16:8 hours light cycle (Light:Dark; separated by crepuscular periods; daylight 1600 lx) while the 130 lx and the 0 lx bioassay were at constant light intensity. Results are given for each color of each color combination including the mixture of both colors and uncolored mosquitoes separately. Adjusted p-values are calculated using Bonferroni adjustment.

| Two-choice assay | Light intensity in Lux | Color     | Null hypothesis | Estimate    | Std. error | t-statistic | p-value    | adjusted P-value | significance |
|------------------|------------------------|-----------|-----------------|-------------|------------|-------------|------------|------------------|--------------|
| red vs blue      | 0                      | red       | female = male   | 0,55961579  | 0,0783479  | 7,14270273  | 9,1505E-13 | 1,0981E-11       | ***          |
| red vs blue      | 0                      | blue      | female = male   | 0,48672807  | 0,08004551 | 6,08064153  | 1,197E-09  | 1,4364E-08       | ***          |
| red vs blue      | 0                      | mixture   | female = male   | 1,42603469  | 0,18308606 | 7,7888762   | 6,6613E-15 | 7,9936E-14       | ***          |
| red vs blue      | 0                      | uncolored | female = male   | 0,09622803  | 0,08015669 | 1,20049909  | 0,22994556 | 1                | n.s.         |
| red vs blue      | 130                    | red       | female = male   | 0,08537961  | 0,06457598 | 1,32215736  | 0,18611576 | 1                | n.s.         |
| red vs blue      | 130                    | blue      | female = male   | -0,48665526 | 0,08962963 | -5,42962466 | 5,6473E-08 | 6,7767E-07       | ***          |
| red vs blue      | 130                    | mixture   | female = male   | 0,62252963  | 0,1181861  | 5,26736775  | 1,3839E-07 | 1,6607E-06       | ***          |
| red vs blue      | 130                    | uncolored | female = male   | 0,71352634  | 0,09361675 | 7,62178116  | 2,5091E-14 | 3,0109E-13       | ***          |
| red vs blue      | 1600                   | red       | female = male   | 0,67445505  | 0,07476965 | 9,02043914  | 0          | 0                | ***          |
| red vs blue      | 1600                   | blue      | female = male   | -0,01587335 | 0,12599218 | -0,12598678 | 0,89974239 | 1                | n.s.         |
| red vs blue      | 1600                   | mixture   | female = male   | 0,69314718  | 0,12909951 | 5,36909227  | 7,9134E-08 | 9,4961E-07       | ***          |
| red vs blue      | 1600                   | uncolored | female = male   | 0,20972053  | 0,12284154 | 1,70724442  | 0,08777663 | 1                | n.s.         |
| red vs green     | 0                      | red       | female = male   | 0,06486063  | 0,09992776 | 0,64907524  | 0,51628975 | 1                | n.s.         |
| red vs green     | 0                      | green     | female = male   | -0,47661887 | 0,1197667  | -3,97956075 | 6,9043E-05 | 0,00082851       | ***          |
| red vs green     | 0                      | mixture   | female = male   | -0,96940056 | 0,35410711 | -2,73759132 | 0,00618909 | 0,07426912       | n.s.         |
| red vs green     | 0                      | uncolored | female = male   | -0,33397015 | 0,07073284 | -4,72157138 | 2,3403E-06 | 2,8084E-05       | ***          |
| red vs green     | 130                    | red       | female = male   | 0,08391197  | 0,07135506 | 1,17597781  | 0,23960375 | 1                | n.s.         |
| red vs green     | 130                    | green     | female = male   | -0,95265838 | 0,13079597 | -7,28354506 | 3,2507E-13 | 3,9009E-12       | ***          |
| red vs green     | 130                    | mixture   | female = male   | -0,45953233 | 0,2128882  | -2,15856174 | 0,03088418 | 0,37061021       | n.s.         |
| red vs green     | 130                    | uncolored | female = male   | 0,72041033  | 0,08642983 | 8,33520516  | 0          | 0                | ***          |
| red vs green     | 1600                   | red       | female = male   | 0,46362103  | 0,06983732 | 6,6385857   | 3,1671E-11 | 3,8005E-10       | ***          |
| red vs green     | 1600                   | green     | female = male   | -0,83093088 | 0,12772678 | -6,50553357 | 7,7418E-11 | 9,2902E-10       | ***          |

|              |      |           |               |             |            |             |            |            |      |
|--------------|------|-----------|---------------|-------------|------------|-------------|------------|------------|------|
| red vs green | 1600 | mixture   | female = male | 0,44895022  | 0,16524214 | 2,71692331  | 0,00658919 | 0,07907025 | n.s. |
| red vs green | 1600 | uncolored | female = male | 0,45953233  | 0,13936843 | 3,29724841  | 0,00097637 | 0,01171645 | *    |
| red vs black | 0    | red       | female = male | -0,11926342 | 0,11217766 | -1,06316552 | 0,28770689 | 1          | n.s. |
| red vs black | 0    | black     | female = male | -0,99852883 | 0,13981729 | -7,14166933 | 9,2215E-13 | 1,1066E-11 | ***  |
| red vs black | 0    | mixture   | female = male | -0,05406722 | 0,32891757 | -0,16437925 | 0,8694326  | 1          | n.s. |
| red vs black | 0    | uncolored | female = male | -0,21928998 | 0,06583577 | -3,33086386 | 0,00086577 | 0,01038923 | *    |
| red vs black | 130  | red       | female = male | -0,69314718 | 0,13363062 | -5,18703854 | 2,1366E-07 | 2,564E-06  | ***  |
| red vs black | 130  | black     | female = male | -0,37729423 | 0,10016992 | -3,76654207 | 0,00016552 | 0,00198629 | **   |
| red vs black | 130  | mixture   | female = male | -1,02165125 | 0,38873012 | -2,62817617 | 0,0085844  | 0,10301286 | n.s. |
| red vs black | 130  | uncolored | female = male | 0,85566611  | 0,06642112 | 12,8824409  | 0          | 0          | ***  |
| red vs black | 1600 | red       | female = male | -0,40989971 | 0,14893922 | -2,75212736 | 0,00592095 | 0,07105139 | n.s. |
| red vs black | 1600 | black     | female = male | -0,16251893 | 0,10996137 | -1,4779638  | 0,13941747 | 1          | n.s. |
| red vs black | 1600 | mixture   | female = male | -0,22314355 | 0,23717075 | -0,94085614 | 0,34677859 | 1          | n.s. |
| red vs black | 1600 | uncolored | female = male | 0,78035324  | 0,08254832 | 9,45329049  | 0          | 0          | ***  |
