# Supplementary material for: Effects of Color and Light Intensity on the Foraging and Oviposition Behavior of Culex pipiens biotype molestus Mosquitoes
Source: MDPI journal article supplement (doi:10.3390/insects13110993), 2022-10-29
Supplement: s1 [file s1]

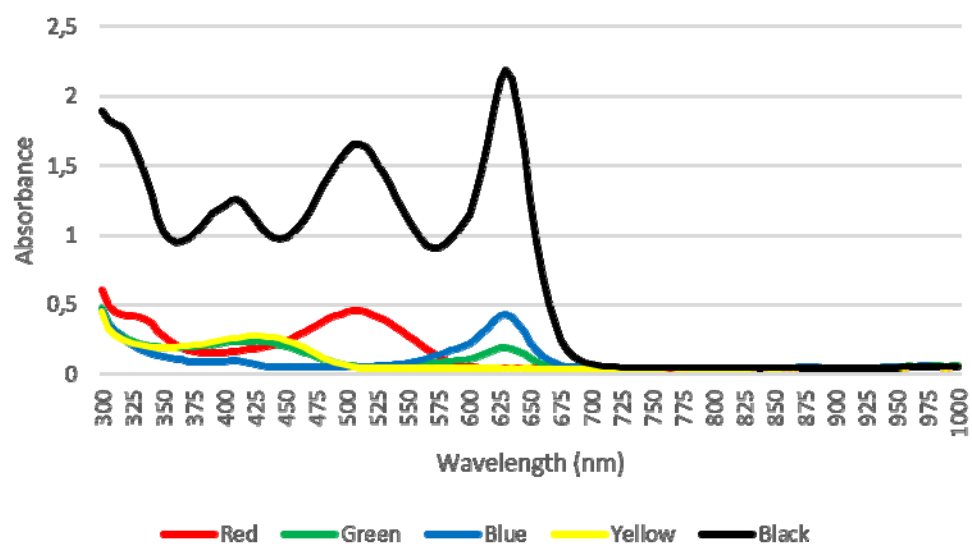

**Figure S2** Absorbance of each ink-solution (red, green, blue, yellow and black) recorded for a volume of 50  $\mu$ l at 300 to 1000 nm via Tecan microplate reader.
