# Supplementary material for: Effects of Color and Light Intensity on the Foraging and Oviposition Behavior of Culex pipiens biotype molestus Mosquitoes
Source: MDPI journal article supplement (doi:10.3390/insects13110993), 2022-10-29
Supplement: s1 [file s1]

**Table S1:** Results of one-sided Wald tests testing for preference of a color in the results of paperboard-wrapped and ink-colored oviposition site bioassay. Both tested at three light intensities. The 1600 lx light intensity was the maximal light intensity of an 16:8 hours light cycle (Light:Dark; separated by crepuscular periods; daylight 1600 lx) while the 130 lx and the 0 lx bioassay were at constant light intensity. The proportion of egg rafts is normalized for each combination of lighting and oviposition site. Results are given for females and males separately. Adjusted p-values are calculated using Bonferroni adjustment.

| Dying method       | Light intensity in Lux | Null hypothesis | Estimate    | Std. error | t-statistic | p-value    | adjusted P-value | significance |
|--------------------|------------------------|-----------------|-------------|------------|-------------|------------|------------------|--------------|
| ink-colored        | 0                      | Blue <= Green   | -0,61518564 | 0,19624861 | -3,13472613 | 0,00086007 | 0,03096263       | *            |
| ink-colored        | 0                      | Blue <= Yellow  | -0,64050345 | 0,19787536 | -3,23690353 | 0,00060417 | 0,02175017       | *            |
| ink-colored        | 0                      | Red >= Blue     | -1,73911574 | 0,30072328 | -5,78310983 | 3,6666E-09 | 1,32E-07         | ***          |
| ink-colored        | 0                      | Red >= Green    | -1,1239301  | 0,31925041 | -3,52052832 | 0,00021534 | 0,00775238       | **           |
| ink-colored        | 0                      | Red >= Yellow   | -1,09861229 | 0,32025297 | -3,43045154 | 0,00030129 | 0,0108464        | *            |
| ink-colored        | 0                      | Yellow >= Green | -0,02531781 | 0,22503553 | -0,11250582 | 0,45521118 | 1                | n.s.         |
| ink-colored        | 130                    | Blue <= Yellow  | -0,56884946 | 0,14261766 | -3,98863264 | 3,3228E-05 | 0,00119619       | **           |
| ink-colored        | 130                    | Blue >= Green   | -1,4569E-12 | 0,12126794 | -1,2014E-11 | 0,5        | 1                | n.s.         |
| ink-colored        | 130                    | Red <= Blue     | -0,58860332 | 0,10693266 | -5,50442975 | 1,8518E-08 | 6,6666E-07       | ***          |
| ink-colored        | 130                    | Red <= Green    | -0,58860332 | 0,10693269 | -5,50442855 | 1,8518E-08 | 6,6666E-07       | ***          |
| ink-colored        | 130                    | Red <= Yellow   | -1,15745279 | 0,1306464  | -8,85943089 | 4,0212E-19 | 1,4476E-17       | ***          |
| ink-colored        | 130                    | Yellow >= Green | -0,56884946 | 0,14261768 | -3,98863215 | 3,3228E-05 | 0,0011962        | **           |
| ink-colored        | 1600                   | Blue >= Green   | 0,03562718  | 0,10090266 | 0,35308462  | 0,6379875  | 1                | n.s.         |
| ink-colored        | 1600                   | Blue >= Yellow  | 1,36649173  | 0,15686887 | 8,71104462  | 1          | 1                | n.s.         |
| ink-colored        | 1600                   | Red <= Blue     | 0,01005034  | 0,10025221 | 0,10025052  | 0,53992728 | 1                | n.s.         |
| ink-colored        | 1600                   | Red <= Green    | -0,02557684 | 0,10115262 | -0,25285398 | 0,40019053 | 1                | n.s.         |
| ink-colored        | 1600                   | Red <= Yellow   | -1,3564414  | 0,15702977 | -8,63811635 | 2,8574E-18 | 1,0287E-16       | ***          |
| ink-colored        | 1600                   | Yellow >= Green | -1,33086456 | 0,15744583 | -8,45284086 | 1,4215E-17 | 5,1174E-16       | ***          |
| paperboard-wrapped | 0                      | Blue <= Yellow  | 0,33647224  | 0,22131336 | 1,52034311  | 0,93578762 | 1                | n.s.         |
| paperboard-wrapped | 0                      | Blue >= Green   | -0,35667494 | 0,22038925 | -1,61838627 | 0,05278969 | 1                | n.s.         |
| paperboard-wrapped | 0                      | Red <= Blue     | -0,64934456 | 0,20855888 | -3,11348314 | 0,00092447 | 0,03328075       | *            |
| paperboard-wrapped | 0                      | Red <= Green    | -0,29266961 | 0,18688329 | -1,56605553 | 0,05866781 | 1                | n.s.         |

|                    |      |                 |             |            |             |            |            |      |
|--------------------|------|-----------------|-------------|------------|-------------|------------|------------|------|
| paperboard-wrapped | 0    | Red <= Yellow   | -0,31287232 | 0,18797219 | -1,66446072 | 0,0480102  | 1          | n.s. |
| paperboard-wrapped | 0    | Yellow >= Green | -0,02020271 | 0,20101781 | -0,10050208 | 0,45997287 | 1          | n.s. |
| paperboard-wrapped | 130  | Blue >= Green   | -0,47692407 | 0,21217718 | -2,24776329 | 0,01229564 | 0,44264319 | n.s. |
| paperboard-wrapped | 130  | Blue >= Yellow  | -5,4817E-16 | 0,23570226 | -2,3257E-15 | 0,5        | 1          | n.s. |
| paperboard-wrapped | 130  | Red <= Blue     | -1,26851133 | 0,18865386 | -6,72401471 | 8,8392E-12 | 3,1821E-10 | ***  |
| paperboard-wrapped | 130  | Red <= Green    | -0,79158725 | 0,15828417 | -5,00105141 | 2,8509E-07 | 1,0263E-05 | ***  |
| paperboard-wrapped | 130  | Red <= Yellow   | -1,26851133 | 0,18865386 | -6,72401473 | 8,8392E-12 | 3,1821E-10 | ***  |
| paperboard-wrapped | 130  | Yellow >= Green | -0,47692407 | 0,21217718 | -2,24776329 | 0,01229564 | 0,44264318 | n.s. |
| paperboard-wrapped | 1600 | Blue >= Green   | -0,51725651 | 0,22691143 | -2,27955244 | 0,01131712 | 0,40741643 | n.s. |
| paperboard-wrapped | 1600 | Blue >= Yellow  | -0,30368241 | 0,23678606 | -1,28251811 | 0,09983048 | 1          | n.s. |
| paperboard-wrapped | 1600 | Red <= Blue     | -0,59136449 | 0,22386346 | -2,64163018 | 0,0041254  | 0,14851456 | n.s. |
| paperboard-wrapped | 1600 | Red <= Green    | -0,07410797 | 0,19258208 | -0,38481239 | 0,35018821 | 1          | n.s. |
| paperboard-wrapped | 1600 | Red <= Yellow   | -0,28768207 | 0,20412423 | -1,40934802 | 0,07936614 | 1          | n.s. |
| paperboard-wrapped | 1600 | Yellow >= Green | -0,2135741  | 0,2074624  | -1,02945932 | 0,15163194 | 1          | n.s. |

---
