# Supplementary material for: Effects of Color and Light Intensity on the Foraging and Oviposition Behavior of Culex pipiens biotype molestus Mosquitoes
Source: MDPI journal article supplement (doi:10.3390/insects13110993), 2022-10-29
Supplement: s1 [file s1]

**A**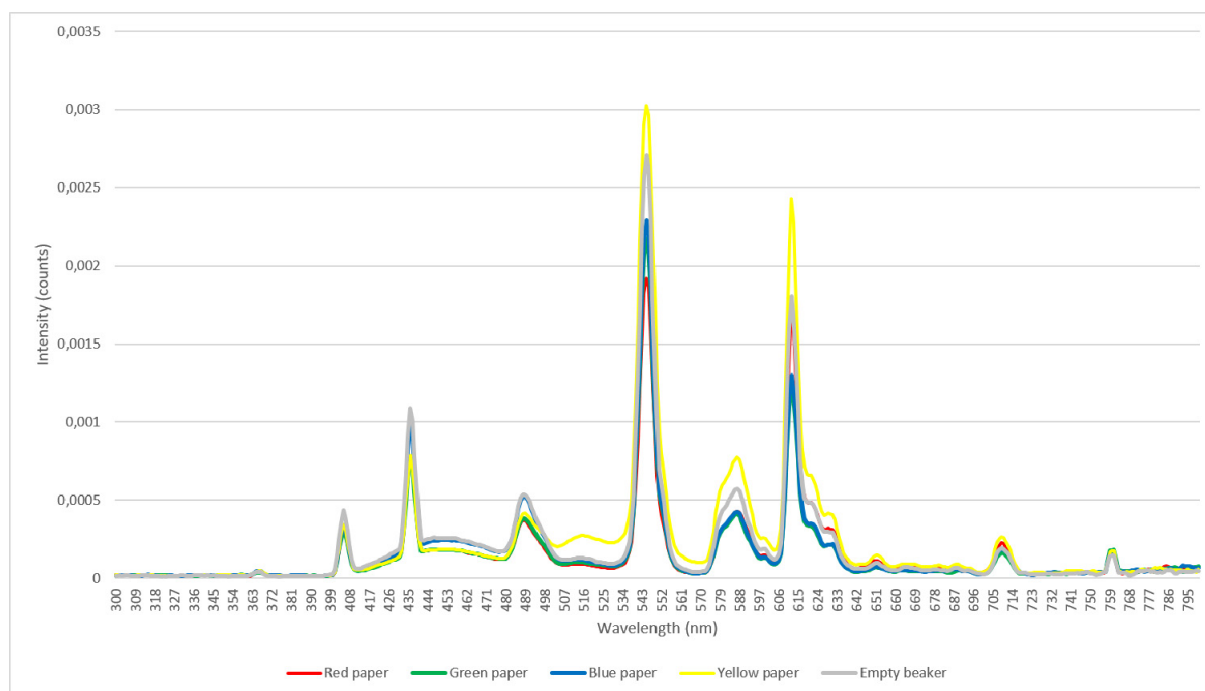**B**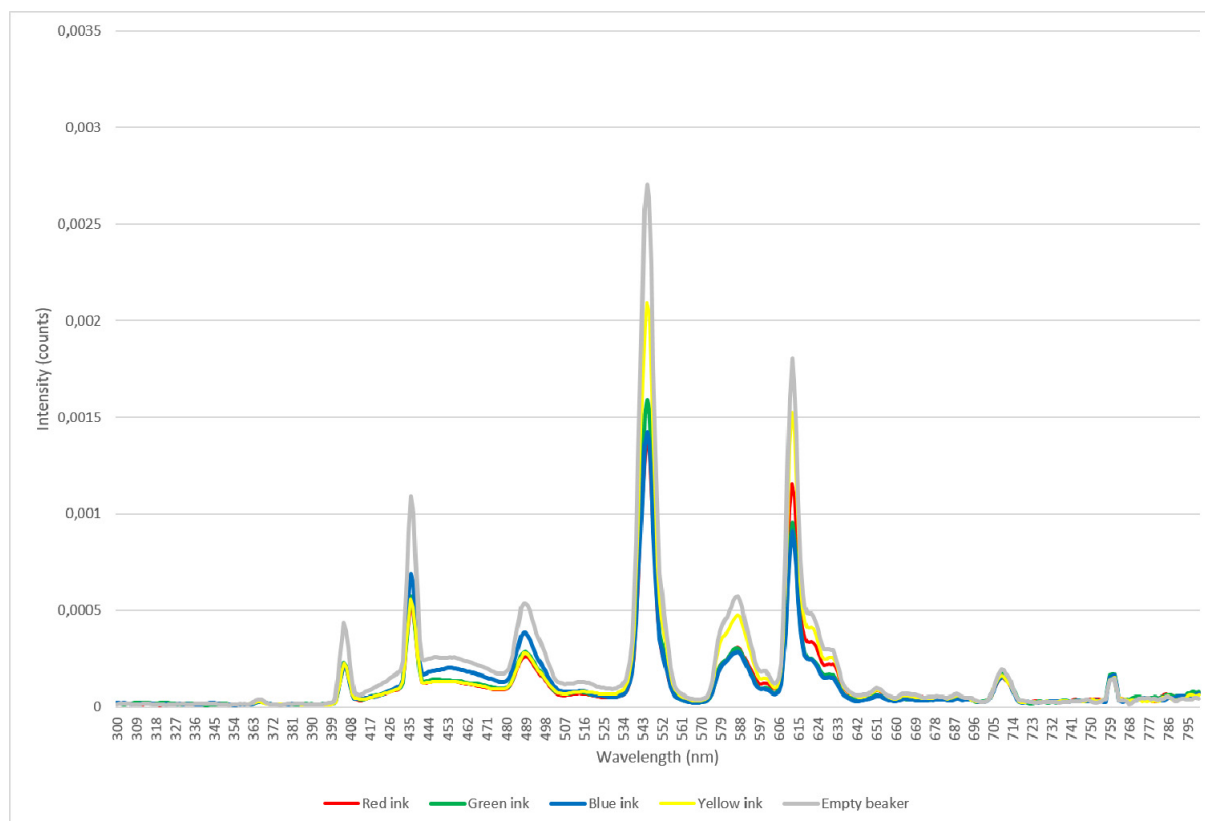

**Figure S1** Wavelength intensity of 100 ml of the colors red, green, blue and yellow in 100 ml-glass beaker compared to an empty beaker measured in a climate chamber lit with fluorescent light sources using a spectrometer. A shows the results for the paperboard-wrapped 100 ml-beakers and B the results for the ink-colored 100 ml-beakers.
