# Supplementary material for: Effects of Color and Light Intensity on the Foraging and Oviposition Behavior of Culex pipiens biotype molestus Mosquitoes
Source: MDPI journal article supplement (doi:10.3390/insects13110993), 2022-10-29
Supplement: s1 [file s1]

**Table S3:** Detailed results of each replicate of the four-choice feeding bioassay. Indicated are the light intensity at which the replicates took place, the total number of colored mosquitoes as well as the number of colored female mosquitoes for the respective colors (red, blue, green, yellow, mixture and uncolored) for each replicate. Furthermore, the number of used mosquitoes in total, separated also in the number of females and males for each replicate are given.

| Lux (lx) | Red total | Red females | Blue total | Blue females | Green total | Green females | Yellow total | Yellow females | Mixture total | Mixture females | Uncolored total | Uncolored females | Mosquitoes total | Mosquito females | Mosquito males |
|----------|-----------|-------------|------------|--------------|-------------|---------------|--------------|----------------|---------------|-----------------|-----------------|-------------------|------------------|------------------|----------------|
| 1600     | 57        | 16          | 5          | 3            | 11          | 7             | 0            | 0              | 6             | 3               | 35              | 9                 | 114              | 38               | 76             |
| 1600     | 41        | 18          | 8          | 6            | 18          | 13            | 2            | 2              | 6             | 6               | 65              | 15                | 140              | 60               | 80             |
| 1600     | 47        | 15          | 25         | 11           | 9           | 7             | 1            | 1              | 13            | 6               | 71              | 22                | 166              | 62               | 104            |
| 1600     | 87        | 8           | 33         | 14           | 68          | 16            | 31           | 8              | 78            | 11              | 82              | 22                | 379              | 79               | 300            |
| 1600     | 98        | 34          | 7          | 5            | 52          | 30            | 23           | 4              | 55            | 23              | 32              | 23                | 267              | 119              | 148            |
| 1600     | 101       | 22          | 21         | 13           | 38          | 19            | 10           | 4              | 87            | 26              | 16              | 7                 | 273              | 91               | 182            |
| 130      | 64        | 35          | 31         | 25           | 8           | 8             | 0            | 0              | 26            | 22              | 75              | 21                | 204              | 111              | 93             |
| 130      | 65        | 20          | 16         | 13           | 9           | 7             | 0            | 0              | 42            | 37              | 118             | 33                | 250              | 110              | 140            |
| 130      | 89        | 37          | 29         | 23           | 15          | 12            | 0            | 0              | 38            | 27              | 148             | 45                | 319              | 144              | 175            |
| 130      | 102       | 35          | 47         | 20           | 151         | 51            | 59           | 13             | 52            | 23              | 111             | 52                | 522              | 194              | 328            |
| 130      | 74        | 26          | 23         | 17           | 35          | 22            | 5            | 3              | 21            | 10              | 21              | 14                | 179              | 92               | 87             |
| 130      | 50        | 9           | 48         | 7            | 49          | 16            | 13           | 5              | 39            | 3               | 35              | 5                 | 234              | 45               | 189            |
| 0        | 15        | 9           | 37         | 17           | 19          | 14            | 0            | 0              | 8             | 8               | 144             | 39                | 223              | 87               | 136            |
| 0        | 24        | 13          | 31         | 13           | 25          | 15            | 0            | 0              | 9             | 7               | 137             | 52                | 226              | 100              | 126            |
| 0        | 24        | 17          | 22         | 17           | 19          | 12            | 0            | 0              | 5             | 4               | 150             | 76                | 220              | 126              | 94             |
| 0        | 115       | 42          | 22         | 11           | 50          | 19            | 1            | 0              | 20            | 8               | 127             | 64                | 335              | 144              | 191            |
| 0        | 27        | 8           | 32         | 18           | 32          | 17            | 11           | 8              | 16            | 6               | 48              | 5                 | 166              | 62               | 104            |
| 0        | 47        | 40          | 41         | 33           | 41          | 30            | 11           | 10             | 39            | 34              | 216             | 31                | 395              | 178              | 217            |
