# Supplementary material for: Effects of Color and Light Intensity on the Foraging and Oviposition Behavior of Culex pipiens biotype molestus Mosquitoes
Source: Insects. 2022 Oct 29;13(11):993. doi: 10.3390/insects13110993 (PMC9698050; doi:10.3390/insects13110993)
Supplement: Supplementary file 1 [file insects-13-00993-s001.zip]

Archive with 7 entries (7 files):
- Supplementary Figure S1 wavelength.pdf
- Supplementary Figure S2 Absorbance.pdf
- Supplementary Table S1_Results of one-sided Wald tests .pdf
- Supplementary Table S2 Results of oviposition bioassay .pdf
- Supplementary Table S3 Detailed results of each replicate of the four-choice feeding bioassay.pdf
- Supplementary Table S4 One-sided statistical analysis of the results of the two-choice feeding bioassay_2022-09-20_FF.pdf
- Supplementary Table S5 Two-sided statistical analysis of the results of the two-choice feeding bioassay_2022-09-20_FF.pdf
